# Supplementary material for: Hypergravity Increases Blood–Brain Barrier Permeability to Fluorescent Dextran and Antisense Oligonucleotide in Mice
Source: MDPI journal article supplement (doi:10.3390/cells12050734), 2023-02-24
Supplement: s1 [file s1]

**Table S1: List of genes modulated by 2g**

| Abbreviation  | Gene name                    | Role in BBB                   | Genecard id |
|---------------|------------------------------|-------------------------------|-------------|
| <i>Actn1</i>  | Actinin alpha 1              | Endothelial cell cytoskeleton | GC14M068874 |
| <i>Actn2*</i> | Actinin alpha 2              | Endothelial cell cytoskeleton | GC01P236686 |
| <i>Actn4</i>  | Actinin alpha 4              | Endothelial cell cytoskeleton | GC19P038647 |
| <i>Cdh2</i>   | Cadherin 2                   | Adherens junction             | GC18M028088 |
| <i>Ctnnd1</i> | Catenin delta 1              | Cadherin associated protein   | GC11P058206 |
| <i>Gja1</i>   | Gap junction protein alpha 1 | Gap junction                  | GC06P121436 |
| <i>Gja4</i>   | Gap junction protein alpha 4 | Gap junction                  | GC01P034792 |
| <i>Jup</i>    | Junction plakoglobin         | Desmosome maintenance         | GC17M041754 |
| <i>Ocln</i>   | Occludin                     | Positive regulation           | GC05P069492 |
| <i>Tjp2</i>   | Tight junction protein 2     | Positive regulation           | GC09P069121 |

\* very low expression in non-neuronal cell types (database: MGI.org and genecards.org)

**Table S2: Cell types expressing genes modified by 2g exposure**

| Effect of 2g | Genes         | Relative expressions in non-neuronal cell types |
|--------------|---------------|-------------------------------------------------|
| ↑            | <i>Gja4</i>   | PC>SMC>EC>FB>MG>>OL-ACØ                         |
| ↑            | <i>Ctnnd1</i> | EC>PC-SMC>FB-OL-AC>MG                           |
| ↑            | <i>Actn1</i>  | SMC>PC-EC-FB>MG-OL-AC                           |
| ↓            | <i>Cdh2</i>   | PC-AC>SMC>EC>OL-FB>MG                           |
| ↓            | <i>Ocln</i>   | EC>>>PC-SMC>AC>FB-OL>MGØ                        |
| ↓            | <i>Actn2</i>  | EC-PC>SMC-FB-MG-OL>ACØ                          |
| ↓            | <i>Jup</i>    | EC-PC-OL>SMC-FB>AC-MG                           |
| ↓            | <i>Actn4</i>  | EC-PC-SMC>OL-FB-AC>MG                           |
| ↓            | <i>Tjp2</i>   | EC-AC-OL>PC-SMC>FB>MGØ                          |
| ↓            | <i>Gja1</i>   | AC>>EC>FB>>PC>SMC>OL-MGØ                        |

AC: astrocyte; EC: endothelial cell; FB: fibroblast; MG: microglia; OL: oligodendrocyte, PC: pericyte; SMC: smooth muscle cell (database: betsholtzlab.org). ↑ upregulated, ↓ downregulated.

**Table S3: Comparison of gene expressions with database from Pulga et al., 2016**

| Gene name     | 2g, 24h | 3g, 21 days <sup>(1)</sup> | Placebo <sup>(1)</sup> | Acute stress <sup>(1)</sup> | Chronic stress <sup>(1)</sup> |
|---------------|---------|----------------------------|------------------------|-----------------------------|-------------------------------|
| <i>Gja4</i>   | ↑       | Ø                          | Ø                      | Ø                           | Ø                             |
| <i>Ctnnd1</i> | ↑       | Ø                          | Ø                      | Ø                           | Ø                             |
| <i>Actn1</i>  | ↑       | Ø                          | Ø                      | Ø                           | Ø                             |
| <i>Cdh2</i>   | ↓       | Ø                          | Ø                      | Ø                           | Ø                             |
| <i>Ocln</i>   | ↓       | Ø                          | Ø                      | Ø                           | Ø                             |
| <i>Actn2</i>  | ↓       | Ø                          | Ø                      | Ø                           | Ø                             |
| <i>Jup</i>    | ↓       | Ø                          | Ø                      | Ø                           | Ø                             |
| <i>Actn4</i>  | ↓       | Ø                          | Ø                      | Ø                           | Ø                             |
| <i>Tjp2</i>   | ↓       | Ø                          | Ø                      | Ø                           | Ø                             |
| <i>Gja1</i>   | ↓       | Ø                          | Ø                      | Ø                           | Ø                             |
| <i>Gja5</i>   | Ø       | Ø                          | Ø                      | Ø                           | Ø                             |
| <i>Actb</i>   | Ø       | Ø                          | Ø                      | Ø                           | Ø                             |
| <i>Actg1</i>  | Ø       | Ø                          | Ø                      | Ø                           | Ø                             |
| <i>Cdh5</i>   | Ø       | Ø                          | Ø                      | Ø                           | Ø                             |
| <i>Cldn1</i>  | Ø       | ↑                          | Ø                      | ↑                           | Ø                             |
| <i>Cldn3</i>  | Ø       | Ø                          | Ø                      | Ø                           | Ø                             |
| <i>Cldn5</i>  | Ø       | Ø                          | ↓                      | Ø                           | Ø                             |
| <i>Ctnna1</i> | Ø       | Ø                          | Ø                      | Ø                           | Ø                             |
| <i>Ctnnb1</i> | Ø       | Ø                          | Ø                      | Ø                           | Ø                             |
| <i>Dsp</i>    | Ø       | Ø                          | Ø                      | Ø                           | Ø                             |
| <i>F11r</i>   | Ø       | Ø                          | Ø                      | Ø                           | Ø                             |
| <i>Jam2</i>   | Ø       | Ø                          | Ø                      | Ø                           | Ø                             |
| <i>Tjp1</i>   | Ø       | Ø                          | Ø                      | Ø                           | Ø                             |
| <i>Vim</i>    | Ø       | Ø                          | Ø                      | Ø                           | Ø                             |

↑ upregulated, ↓ downregulated, Ø not changed.
